# Supplementary material
Source: Springer Nature journal article supplement (https://www.springermedizin.de/resource/supplementary/12879_2010_1509_MOESM8_ESM.pdf/9442654)

## Badge 1852 Opportunities

## Badge 1852 Actions

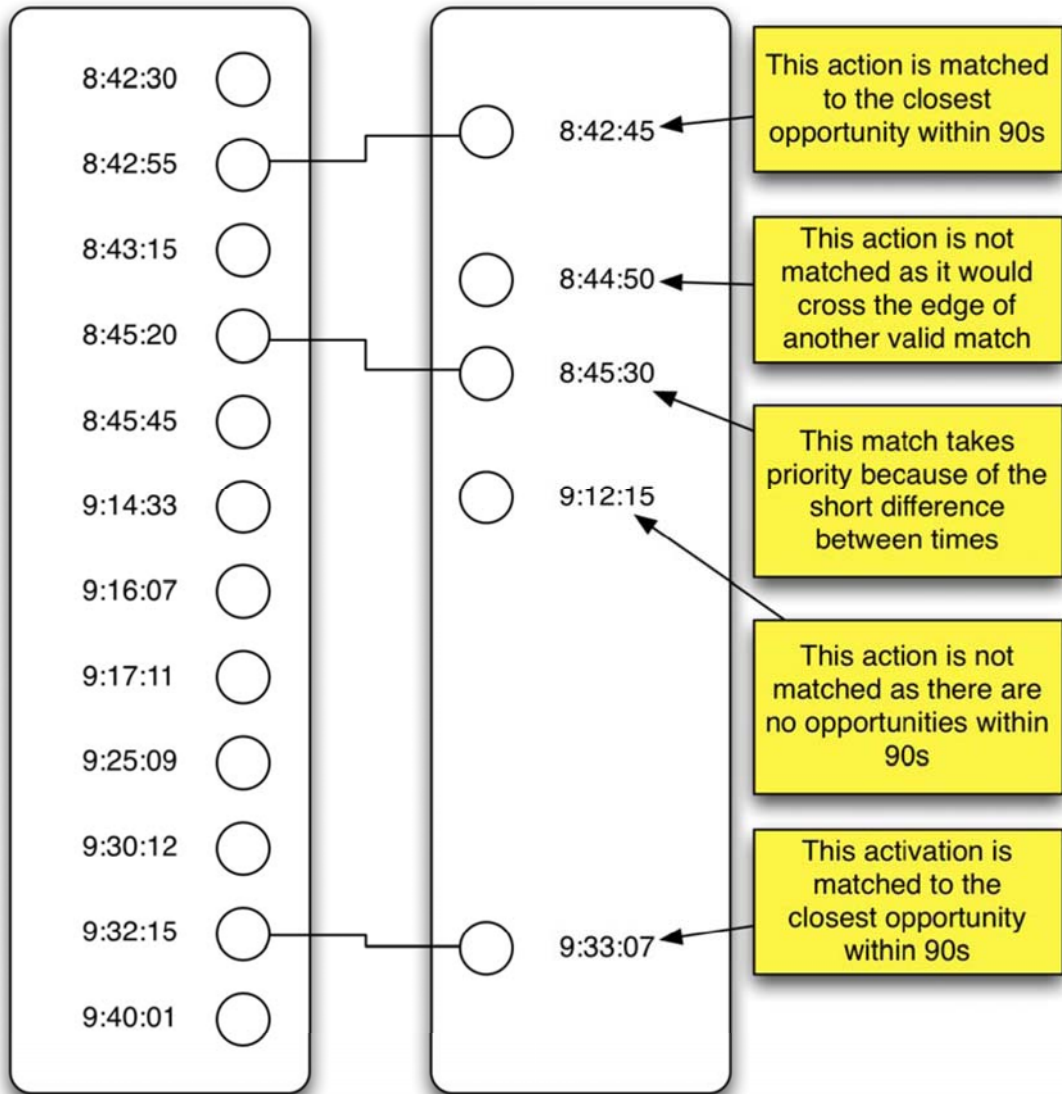

Supplement: MOESM8 [file 9442654]
